# Supplementary material for: Exploring a unified description of the super-Arrhenius region above and below the glass transition temperature
Source: Royal Society of Chemistry journal article supplement (doi:10.1039/d0sm00539h), 2020-01-01
Supplement: d0sm00539h1.pdf [file d0sm00539h1.pdf]

## Supplementary Information

# Exploring a unified description of the super-Arrhenius region above and below the glass transition temperature

*Georgios Kritikos*

Laboratory of Physical Chemistry, Department of Chemical Engineering, Aristotle University of  
Thessaloniki, 54124 Thessaloniki, Greece

In the Supplementary Information section are presented: Figure S1 that depicts the exponential characteristics of the  $g$  function, Tables S1-S4 that provide the parameters of the fitting presented in Figure 1, Figure S2/Table S5 and Figure S3/Table S6 that describe the fitting to PS nanocomposites and to PI segmental and normal modes respectively, Table S7 with the fitting parameters of iPMMA dynamics shown in Figure 5 and Tables S8-S11 for the comparison with the VFT.

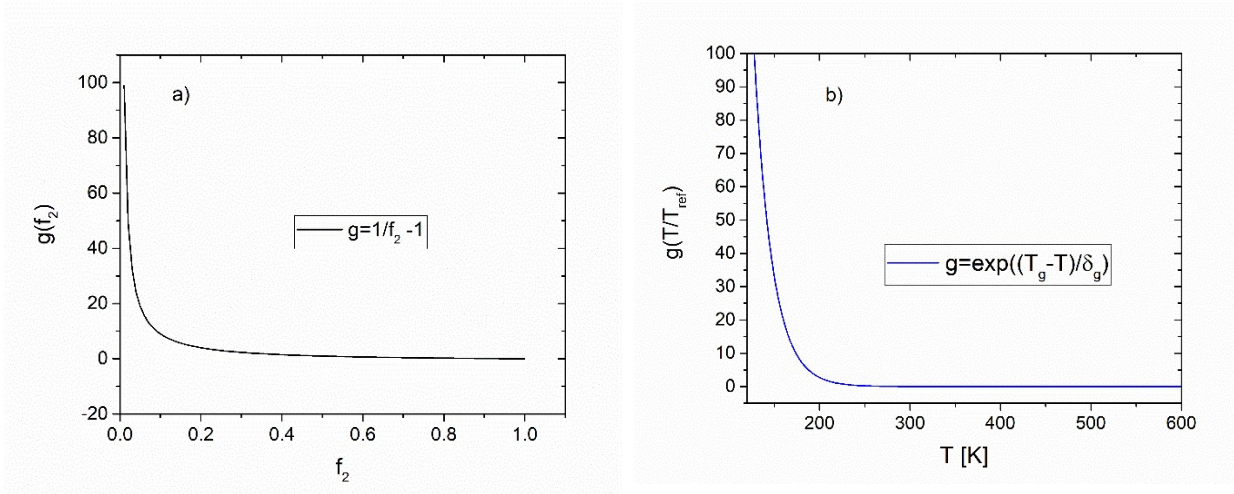

**Figure S1.** Plot of  $g$ , a) as a function of  $f_2$  (fraction of mobile regions) for the region  $0 \leq f_2 \leq 1$  and b) as a function of temperature for  $T_g = 220$  K and  $\delta_g = 20$  K.

**Table S1.** Parameters for the fitting of (i) 16.5 mol% chlorobenzene/cis-decalin, (ii) 9.9 mol% 1-chloronaphthalene/cis-decalin and (iii) 8.7 mol% o-dichlorobenzene/cis-decalin. The  $\beta$ -relaxation is fitted with the Arrhenius equation, while the  $\alpha$ -relaxation with the eq. 7.

|                            | $B$ [K] | $F_o$ [Hz]                 | $T_g$ [K] | $\delta_g$ [K] |
|----------------------------|---------|----------------------------|-----------|----------------|
| $\beta$ -relaxation (i)    | 2284±10 | (8.9±0.1)×10 <sup>11</sup> |           |                |
| $\alpha$ -relaxation (i)   | 2284±10 | (7.0±0.1)×10 <sup>12</sup> | 133±5     | 9±2            |
| $\beta$ -relaxation (ii)   | 3318±10 | (1.6±0.1)×10 <sup>15</sup> |           |                |
| $\alpha$ -relaxation (ii)  | 3318±10 | (6.4±0.1)×10 <sup>14</sup> | 140±5     | 8±2            |
| $\beta$ -relaxation (iii)  | 2586±10 | (1.5±0.1)×10 <sup>15</sup> |           |                |
| $\alpha$ -relaxation (iii) | 2586±10 | (4.1±0.1)×10 <sup>13</sup> | 139±5     | 7±2            |

**Table S2.** Parameters for the fitting of (i) 43.4 mol% chlorobenzene/pyridine and (ii) o-terphenyl.

|                           | $B$ [K]       | $F_o$ [Hz]                                | $T_g$ [K]   | $\delta_g$ [K] |
|---------------------------|---------------|-------------------------------------------|-------------|----------------|
| $\beta$ -relaxation (i)   | 2673 $\pm$ 10 | (1.2 $\pm$ 0.1) $\times$ 10 <sup>14</sup> |             |                |
| $\alpha$ -relaxation (i)  | 2673 $\pm$ 10 | (3.4 $\pm$ 0.1) $\times$ 10 <sup>13</sup> | 128 $\pm$ 5 | 6 $\pm$ 2      |
| $\beta$ -relaxation (ii)  | 8898 $\pm$ 10 | (4.5 $\pm$ 0.1) $\times$ 10 <sup>21</sup> |             |                |
| $\alpha$ -relaxation (ii) | 8898 $\pm$ 10 | (8.7 $\pm$ 0.1) $\times$ 10 <sup>20</sup> | 248 $\pm$ 5 | 11 $\pm$ 2     |

**Table S3.** Parameters for the fitting of (i) 36.8 mol% 1-chloronaphthalene/pyridine, (ii) 43.8 mol% toluene/pyridine and (ii) 42.5 mol% bromobenzene/pyridine.

|                            | $B$ [K]       | $F_o$ [Hz]                                | $T_g$ [K]   | $\delta_g$ [K] |
|----------------------------|---------------|-------------------------------------------|-------------|----------------|
| $\beta$ -relaxation (i)    | 2046 $\pm$ 10 | (4.3 $\pm$ 0.1) $\times$ 10 <sup>11</sup> |             |                |
| $\alpha$ -relaxation (i)   | 2046 $\pm$ 10 | (1.6 $\pm$ 0.1) $\times$ 10 <sup>11</sup> | 151 $\pm$ 5 | 8 $\pm$ 2      |
| $\beta$ -relaxation (ii)   | 2230 $\pm$ 10 | (1.0 $\pm$ 0.1) $\times$ 10 <sup>12</sup> |             |                |
| $\alpha$ -relaxation (ii)  | 2230 $\pm$ 10 | (2.2 $\pm$ 0.1) $\times$ 10 <sup>12</sup> | 130 $\pm$ 5 | 5 $\pm$ 2      |
| $\beta$ -relaxation (iii)  | 2257 $\pm$ 10 | (1.0 $\pm$ 0.1) $\times$ 10 <sup>13</sup> |             |                |
| $\alpha$ -relaxation (iii) | 2257 $\pm$ 10 | (3.7 $\pm$ 0.1) $\times$ 10 <sup>11</sup> | 136 $\pm$ 5 | 5 $\pm$ 2      |

**Table S4.** Parameters for the fitting of (i) dimethyl phthalate and (ii) diethyl phthalate.

|  | $B$ [K] | $F_o$ [Hz] | $T_g$ [K] | $\delta_g$ [K] |
|--|---------|------------|-----------|----------------|
|--|---------|------------|-----------|----------------|

|                           |               |                                |             |            |
|---------------------------|---------------|--------------------------------|-------------|------------|
| $\beta$ -relaxation (i)   | $4932 \pm 10$ | $(1.2 \pm 0.1) \times 10^{15}$ |             |            |
| $\alpha$ -relaxation (i)  | $4932 \pm 10$ | $(1.2 \pm 0.1) \times 10^{16}$ | $198 \pm 5$ | $15 \pm 2$ |
| $\beta$ -relaxation (ii)  | $3954 \pm 10$ | $(1.5 \pm 0.1) \times 10^{14}$ |             |            |
| $\alpha$ -relaxation (ii) | $3954 \pm 10$ | $(2.4 \pm 0.1) \times 10^{15}$ | $188 \pm 5$ | $16 \pm 2$ |

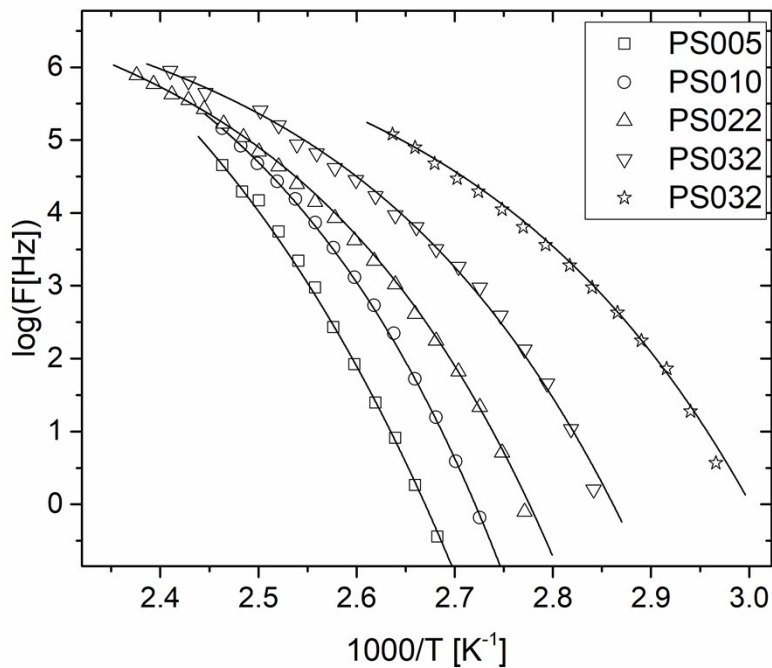

**Figure S2.** Frequency  $F$  vs inverse temperature of the  $\alpha$ -mechanism, for various percentages of Phenethyl-POSS in the PS matrix. The solid lines represent fits according to eq. 7.

**Table S5.** Values of the fitting parameters of eq. 7 to the experimental results presented in Figure S2.

|              | $B$ [K]       | $F_o$ [Hz]                     | $T_g$ [K]   | $\delta_g$ [K] |
|--------------|---------------|--------------------------------|-------------|----------------|
| <b>PS005</b> | $7279 \pm 50$ | $(2.5 \pm 0.1) \times 10^{15}$ | $367 \pm 2$ | $40 \pm 5$     |

|              |         |                            |       |      |
|--------------|---------|----------------------------|-------|------|
| <b>PS010</b> | 7473±50 | (3.8±0.1)x10 <sup>14</sup> | 355±2 | 30±5 |
| <b>PS022</b> | 5302±50 | (9.5±0.1)x10 <sup>11</sup> | 356±2 | 30±5 |
| <b>PS032</b> | 5013±50 | (4.8±0.1)x10 <sup>11</sup> | 346±2 | 30±5 |
| <b>PS038</b> | 5548±50 | (1.7±0.1)x10 <sup>12</sup> | 323±2 | 28±5 |

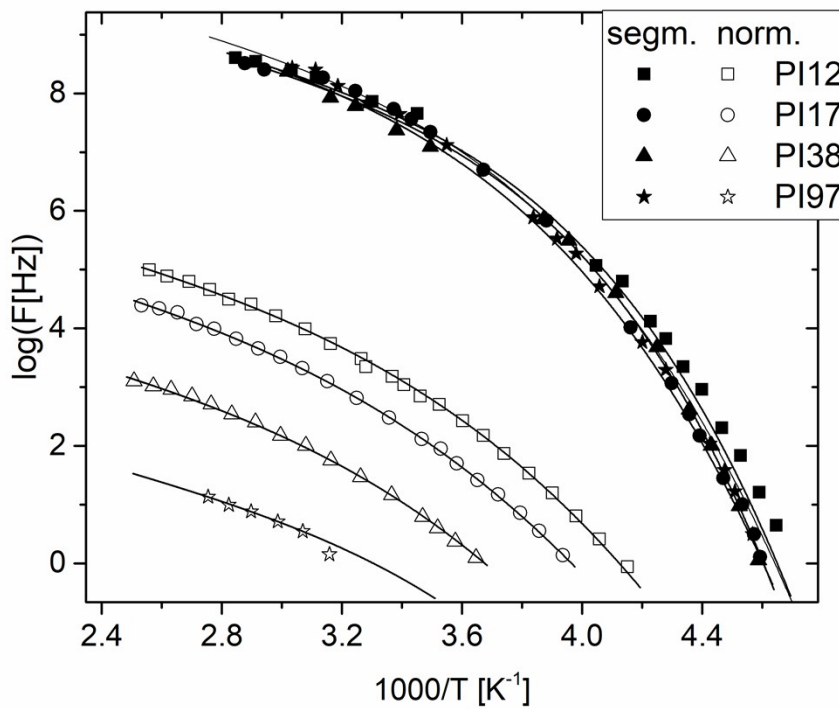

**Figure S3.** Frequency  $F$  vs inverse temperature of the segmental and normal modes of PI for various MWs.

**Table S6.** Values of the fitting parameters of eq. 7 to the experimental results presented in Figure S3.

| $B$ [K] | $F_o$ [Hz] | $T_g$ [K] | $\delta_g$ [K] |
|---------|------------|-----------|----------------|
|---------|------------|-----------|----------------|

|                 |         |                            |       |      |
|-----------------|---------|----------------------------|-------|------|
| <b>PI12segm</b> | 3245±50 | (4.9±0.1)x10 <sup>12</sup> | 213±2 | 30±5 |
| <b>PI12norm</b> | 3277±50 | (5.1±0.1)x10 <sup>8</sup>  | 209±2 | 46±5 |
| <b>PI17segm</b> | 3284±50 | (4.8±0.1)x10 <sup>12</sup> | 215±2 | 30±5 |
| <b>PI17norm</b> | 3245±50 | (1.3±0.1)x10 <sup>8</sup>  | 211±2 | 52±5 |
| <b>PI38segm</b> | 3310±50 | (6.9±0.1)x10 <sup>12</sup> | 215±2 | 35±5 |
| <b>PI38norm</b> | 3245±50 | (5.5±0.1)x10 <sup>6</sup>  | 215±2 | 47±5 |
| <b>PI97segm</b> | 3245±50 | (8.1±0.1)x10 <sup>12</sup> | 214±2 | 35±5 |
| <b>PI97norm</b> | 3276±50 | (1.3±0.1)x10 <sup>5</sup>  | 215±2 | 36±5 |

**Table S7.** Fitting parameters of iPMMA dynamics shown in Figure 5, in the bulk and at various film thicknesses. The common  $\beta$ -relaxation is fitted with the Arrhenius equation, while the  $\alpha$ -relaxation with eq. 7.

|                                             | <b>B [K]</b> | <b>1/<math>\tau_0</math> [s<sup>-1</sup>]</b> | <b>T<sub>g</sub> [K]</b> | <b><math>\delta_g</math> [K]</b> |
|---------------------------------------------|--------------|-----------------------------------------------|--------------------------|----------------------------------|
| <b><math>\beta</math>-relaxation iPMMA</b>  | 8089±20      | (3.4±0.1)x10 <sup>14</sup>                    |                          |                                  |
| <b><math>\alpha</math>-relaxation bulk</b>  | 8089±20      | (5.5±0.1)x10 <sup>15</sup>                    | 323±5                    | 21±5                             |
| <b><math>\alpha</math>-relaxation 137nm</b> | 8089±20      | (6.1±0.1)x10 <sup>15</sup>                    | 321±5                    | 21±5                             |
| <b><math>\alpha</math>-relaxation 68nm</b>  | 8089±20      | (5.5±0.1)x10 <sup>15</sup>                    | 316±5                    | 24±5                             |
| <b><math>\alpha</math>-relaxation 36nm</b>  | 8089±20      | (7.3±0.1)x10 <sup>15</sup>                    | 311±5                    | 25±5                             |
| <b><math>\alpha</math>-relaxation 20nm</b>  | 8089±20      | (3.9±0.1)x10 <sup>16</sup>                    | 305±5                    | 37±5                             |

**Table S8.** Parameters ( $B$ ,  $F_o$ , and  $T_o$ ) for the VFT fitting of (i) 16.5 mol% chlorobenzene/cis-decalin, (ii) 9.9 mol% 1-chloronaphthalene/cis-decalin and (iii) 8.7 mol% o-dichlorobenzene/cis-

decalin.<sup>1</sup> Also, a column with the ratio  $\frac{T_g - \delta_g}{T_o}$  is presented, where  $T_g$  and  $\delta_g$  are the model's parameters (eq. 7).

|                       | $B$ [K]     | $F_o$ [Hz]                       | $T_o$ [K]   | $\frac{T_g - \delta_g}{T_o}$ |
|-----------------------|-------------|----------------------------------|-------------|------------------------------|
| $\alpha$ -relax (i)   | 751 $\pm$ 5 | (3.6 $\pm$ 0.1)x10 <sup>13</sup> | 110 $\pm$ 5 | 1.1                          |
| $\alpha$ -relax (ii)  | 645 $\pm$ 5 | (1.8 $\pm$ 0.1)x10 <sup>12</sup> | 121 $\pm$ 5 | 1.1                          |
| $\alpha$ -relax (iii) | 579 $\pm$ 5 | (1.0 $\pm$ 0.1)x10 <sup>13</sup> | 121 $\pm$ 5 | 1.1                          |

**Table S9.** Parameters ( $B$ ,  $F_o$ , and  $T_o$ ) for the VFT fitting of sPMMA.<sup>2</sup>

|                 | $B$ [K]     | $F_o$ [Hz]                     | $T_o$ [K]   | $\frac{T_g - \delta_g}{T_o}$ |
|-----------------|-------------|--------------------------------|-------------|------------------------------|
| $\alpha$ -relax | 816 $\pm$ 5 | ( $\pm$ 0.1)x10 <sup>-12</sup> | 380 $\pm$ 5 | 1.0                          |

**Table S10.** Parameters ( $B$ ,  $F_o$ , and  $T_o$ ) for the VFT fitting of PS.<sup>3</sup>

|                 | $B$ [K]     | $F_o$ [Hz]                       | $T_o$ [K]   | $\frac{T_g - \delta_g}{T_o}$ |
|-----------------|-------------|----------------------------------|-------------|------------------------------|
| $\alpha$ -relax | 475 $\pm$ 5 | (3.2 $\pm$ 0.1)x10 <sup>10</sup> | 334 $\pm$ 5 | 1.0                          |

**Table S11.** Parameters ( $B$ ,  $F_o$ , and  $T_o$ ) for the VFT fitting of cis PI.<sup>4</sup>

|                 | $B$ [K]     | $F_o$ [Hz]                       | $T_o$ [K]   | $\frac{T_g - \delta_g}{T_o}$ |
|-----------------|-------------|----------------------------------|-------------|------------------------------|
| $\alpha$ -relax | 758 $\pm$ 5 | (1.9 $\pm$ 0.1) $\times 10^{10}$ | 179 $\pm$ 5 | 1.0                          |

## References

- (1) Johari, C. P.; Goldstein, M. Viscous Liquids and the Glass Transition. II. Secondary Relaxations in Glasses of Rigid Molecules. *J. Chem. Phys.* **1970**, *53* (6), 2372–2388.
- (2) Bergman, R.; Alvarez, F.; Alegría, A.; Colmenero, J. The Merging of the Dielectric  $\alpha$ - And  $\beta$ -Relaxations in Poly-(Methyl Methacrylate). *J. Chem. Phys.* **1998**, *109* (17), 7546–7555.
- (3) Hao, N.; Böhning, M.; Schönhals, A. Dielectric Properties of Nanocomposites Based on Polystyrene and Polyhedral Oligomeric Phenethyl-Silsesquioxanes. *Macromolecules* **2007**, *40* (26), 9672–9679.
- (4) Roland, C. M.; Schroeder, M. J.; Fontanella, J. J.; Ngai, K. L. Evolution of the Dynamics in 1,4-Polyisoprene from a Nearly Constant Loss to a Johari-Goldstein  $\beta$ -Relaxation to the  $\alpha$ -Relaxation. *Macromolecules* **2004**, *37* (7), 2630–2635.
